# Supplementary material
Source: PubMed Central journal article supplement (PMC8903338)
Supplement: dyac007_supplementary_data.pdf [file dyac007_supplementary_data.pdf]

## SUPPLEMENTARY MATERIAL

**Benderly M *et al.***

**Fighting a pandemic: sociodemographic disparities and coronavirus disease-2019 vaccination gaps. A population study**

### **Table of contents:**

|                             |       |
|-----------------------------|-------|
| Supplementary tables .....  | 2-5   |
| Supplementary figures ..... | 6-11  |
| Method details .....        | 12-13 |

**SUPPLEMENTARY TABLES**

**Table S1: Characteristics of pre-vaccination COVID-19 cases excluded from the study population compared to the general population**

| Characteristic          | Pre-vaccination cases |        | General population |        |
|-------------------------|-----------------------|--------|--------------------|--------|
|                         | N (%)                 |        | N (%)              |        |
| <b>Men</b>              | 140 427               | (49.7) | 3 318 418          | (48.9) |
| <b>Age, years</b>       |                       |        |                    |        |
| 15-19                   | 40 833                | (14.4) | 742 528            | (11.0) |
| 20-24                   | 40 479                | (14.3) | 674 039            | (9.9)  |
| 25-34                   | 55 422                | (19.6) | 1 263 569          | (18.6) |
| 35-44                   | 44 476                | (15.7) | 1 198 852          | (17.7) |
| 45-54                   | 40 561                | (14.3) | 984 829            | (14.5) |
| 55-59                   | 15 911                | (5.6)  | 412 122            | (6.1)  |
| 60-64                   | 13 581                | (4.8)  | 390 600            | (5.8)  |
| 65-74                   | 18 462                | (6.5)  | 674 953            | (10.0) |
| ≥75                     | 13 134                | (4.6)  | 437 892            | (6.5)  |
| <b>Population group</b> |                       |        |                    |        |
| Arabs                   | 65 511                | (23.2) | 1 237 095          | (18.2) |
| Orthodox Jews           | 7 737                 | (2.7)  | 199 064            | (2.9)  |
| Ultra-orthodox Jews     | 71 851                | (25.4) | 538 017            | (7.9)  |
| Other*                  | 137 760               | (48.7) | 4 805 208          | (70.9) |
| <b>SES rank</b>         |                       |        |                    |        |
| 1-3                     | 90 133                | (32.1) | 1 304 534          | (20.0) |
| 4-5                     | 97 769                | (34.8) | 1 953 809          | (30.0) |
| 6-7                     | 69 861                | (24.8) | 2 181 175          | (33.5) |
| 8-10                    | 23 449                | (8.3)  | 1 075 421          | (16.5) |
| <b>Periphery</b>        |                       |        |                    |        |
| Very peripheral         | 20375                 | (7.2)  | 650 746            | (9.6)  |
| Peripheral              | 84247                 | (29.8) | 1 990 177          | (29.4) |
| Central                 | 62343                 | (22.0) | 1 382 096          | (20.4) |
| Very central            | 115880                | (41.0) | 2 751 380          | (40.6) |

SES denotes socioeconomic status.. \* Other population group mostly comprising non-orthodox Jews

**Table S2: Distribution of age groups by socio-demographic characteristics among 6 478 999 individuals age 15 and older**

|                                                      |                 | Median | Interquartile range |       |
|------------------------------------------------------|-----------------|--------|---------------------|-------|
|                                                      |                 |        | 25%                 | 75%   |
| <b>Population group</b> <sup>a</sup>                 | Arabs           | 30-34  | 20-24               | 45-49 |
|                                                      | Orthodox        | 35-39  | 20-24               | 50-54 |
|                                                      | Ultra-Orthodox  | 30-34  | 20-24               | 45-49 |
|                                                      | Other           | 40-44  | 25-29               | 60-64 |
| <b>SES class</b>                                     | 1-3             | 30-34  | 20-24               | 45-49 |
|                                                      | 4-5             | 40-44  | 25-29               | 55-59 |
|                                                      | 6-7             | 40-44  | 25-29               | 60-64 |
|                                                      | 8-10            | 40-44  | 30-34               | 60-64 |
| <b>Persons/household area mean</b>                   | 0-2.0           | 35-39  | 30-34               | 55-59 |
|                                                      | 2.1-6.0         | 40-44  | 25-29               | 55-59 |
|                                                      | 6.1-10.0        | 25-29  | 20-24               | 40-44 |
| <b>Locality population</b>                           | <2000           | 40-44  | 25-29               | 55-59 |
|                                                      | 2000-99 900     | 35-39  | 25-29               | 55-59 |
|                                                      | 100 000-499 900 | 40-44  | 25-29               | 60-64 |
|                                                      | ≥500 000        | 35-39  | 20-24               | 50-54 |
| <b>Population density</b> population/km <sup>2</sup> | <746            | 40-44  | 25-29               | 55-59 |
|                                                      | 746-3064        | 35-39  | 25-29               | 50-54 |
|                                                      | 3064-11 137     | 40-44  | 25-29               | 55-59 |
|                                                      | > 11 137        | 40-44  | 25-29               | 55-59 |
| <b>Periphery</b>                                     | Very central    | 40-44  | 25-29               | 55-59 |
|                                                      | Central         | 40-44  | 25-29               | 55-59 |
|                                                      | Peripheral      | 35-39  | 25-29               | 55-59 |
|                                                      | Very peripheral | 35-39  | 20-24               | 50-54 |

SES denotes socioeconomic status.  $P < 0.0001$  for all. <sup>a</sup> Other population group mostly comprising non-orthodox Jews

**Table S3: Unadjusted cumulative vaccination incidence\***

| <b>Characteristic</b>                               |                     | <b>Cumulative incidence (%)</b> |
|-----------------------------------------------------|---------------------|---------------------------------|
| <b>Sex</b>                                          | Men                 | 73.9                            |
|                                                     | Women               | 73.6                            |
| <b>Age</b>                                          | 15-19               | 43.7                            |
|                                                     | 20-24               | 66.7                            |
|                                                     | 25-34               | 64.5                            |
|                                                     | 35-44               | 69.5                            |
|                                                     | 45-54               | 81.4                            |
|                                                     | 55-59               | 83.8                            |
|                                                     | 60-64               | 89.3                            |
|                                                     | 65-74               | 95.0                            |
| <b>Population group</b>                             | ≥75                 | 95.8                            |
|                                                     | Arabs               | 64.8                            |
|                                                     | Orthodox Jews       | 78.1                            |
|                                                     | Ultra-orthodox Jews | 54.2                            |
|                                                     | Other               | 78.0                            |
| <b>SES class</b>                                    | 1-3                 | 61.0                            |
|                                                     | 4-5                 | 74.2                            |
|                                                     | 6-7                 | 82.4                            |
|                                                     | 8-10                | 86.7                            |
| <b>Locality population</b>                          | <2,000              | 81.3                            |
|                                                     | 2000-99 900         | 73.3                            |
|                                                     | 100 000-499 900     | 75.4                            |
|                                                     | ≥500 ,000           | 54.1                            |
| <b>Population density population/km<sup>2</sup></b> | <746                | 79.9                            |
|                                                     | 746-3064            | 76.7                            |
|                                                     | 3064-11 137         | 76.6                            |
|                                                     | > 11 137            | 75.6                            |
| <b>Periphery</b>                                    | Very central        | 73.5                            |
|                                                     | Central             | 75.6                            |
|                                                     | Peripheral          | 74.3                            |
|                                                     | Very peripheral     | 69.2                            |

\* Cumulative incidence at the end of follow-up accounting for the competing COVID-19 infections.  
SES-socioeconomic class

**Table S4: Multivariable adjusted cause-specific vaccination hazard ratio among 6 478 999 individuals age 15 and older**

| <b>Characteristic (reference value)</b>                          |                     | <b>HR</b> | <b>(95% CI)</b> |
|------------------------------------------------------------------|---------------------|-----------|-----------------|
| <b>Men (Women)</b>                                               |                     | 1.06      | (1.045-1.075)   |
| <b>Age (20-24)</b>                                               | 15-19               | 0.52      | (0.501-0.537)   |
|                                                                  | 25-34               | 0.93      | (0.909-0.955)   |
|                                                                  | 35-44               | 1.08      | (1.048-1.107)   |
|                                                                  | 45-54               | 1.51      | (1.472-1.549)   |
|                                                                  | 55-59               | 1.71      | (1.668-1.755)   |
|                                                                  | 60-64               | 2.18      | (2.120-2.240)   |
|                                                                  | 65-74               | 3.10      | (3.005-3.190)   |
|                                                                  | ≥75                 | 3.22      | (3.119-3.322)   |
| <b>Population group (Other)</b>                                  | Arabs               | 0.96      | (0.936-0.983)   |
|                                                                  | Orthodox Jews       | 0.95      | (0.899-0.997)   |
|                                                                  | Ultra-orthodox Jews | 0.70      | (0.681-0.725)   |
| <b>SES class (1-3)</b>                                           | 4-5                 | 1.24      | (1.215-1.275)   |
|                                                                  | 6-7                 | 1.67      | (1.628-1.718)   |
|                                                                  | 8-10                | 2.05      | (1.981-2.116)   |
| <b>Locality population (&lt;2,000)</b>                           | 2000-99 900         | 0.84      | (0.821-0.867)   |
|                                                                  | 100 000-499 900     | 0.80      | (0.771-0.822)   |
|                                                                  | ≥500 ,000           | 0.75      | (0.723-0.787)   |
| <b>Population density population/km<sup>2</sup> (&lt;746)</b>    | 746-3064            | 1.02      | (0.989-1.043)   |
|                                                                  | 3064-11 137         | 1.00      | (0.972-1.039)   |
|                                                                  | > 11 137            | 0.95      | (0.918-0.988)   |
| <b>Periphery (Central)</b>                                       | Very central        | 1.03      | (1.012-1.058)   |
|                                                                  | Peripheral          | 1.07      | (1.049-1.095)   |
|                                                                  | Very peripheral     | 1.00      | (0.968-1.025)   |
| <b>Past SARS-CoV-2 Infection rates<sup>a</sup> % (&lt;0.011)</b> | 0.011-0.383         | 1.50      | (1.448-1.549)   |
|                                                                  | > 0.383             | 1.71      | (1.658-1.768)   |

CI denotes confidence interval, HR-hazard ratio, SES-socioeconomic class. P<0.0001 for all. <sup>a</sup> Past SARS=CoV-2 infection rate tertiles.

## SUPPLEMENTARY FIGURES

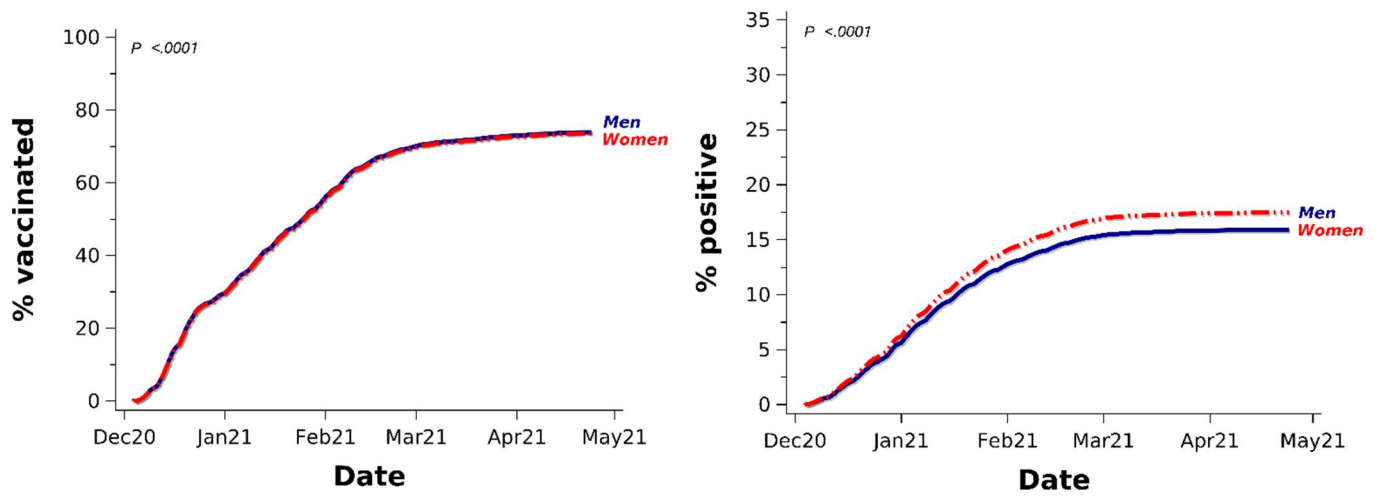

**Figure S1: Cumulative vaccination incidence (left panel) and competing SARS-CoV-2 infection rates (right panel) by sex, among 6 478 999 Israeli residents, age 15 or above**

Percent (%) of vaccinated refer to cumulative incidence /100 accounting for the competing COVID-19 infection risk. % positive refers to cumulative SARS-CoV-2 infection rate/100 based on Kaplan-Meier infection-free survival.

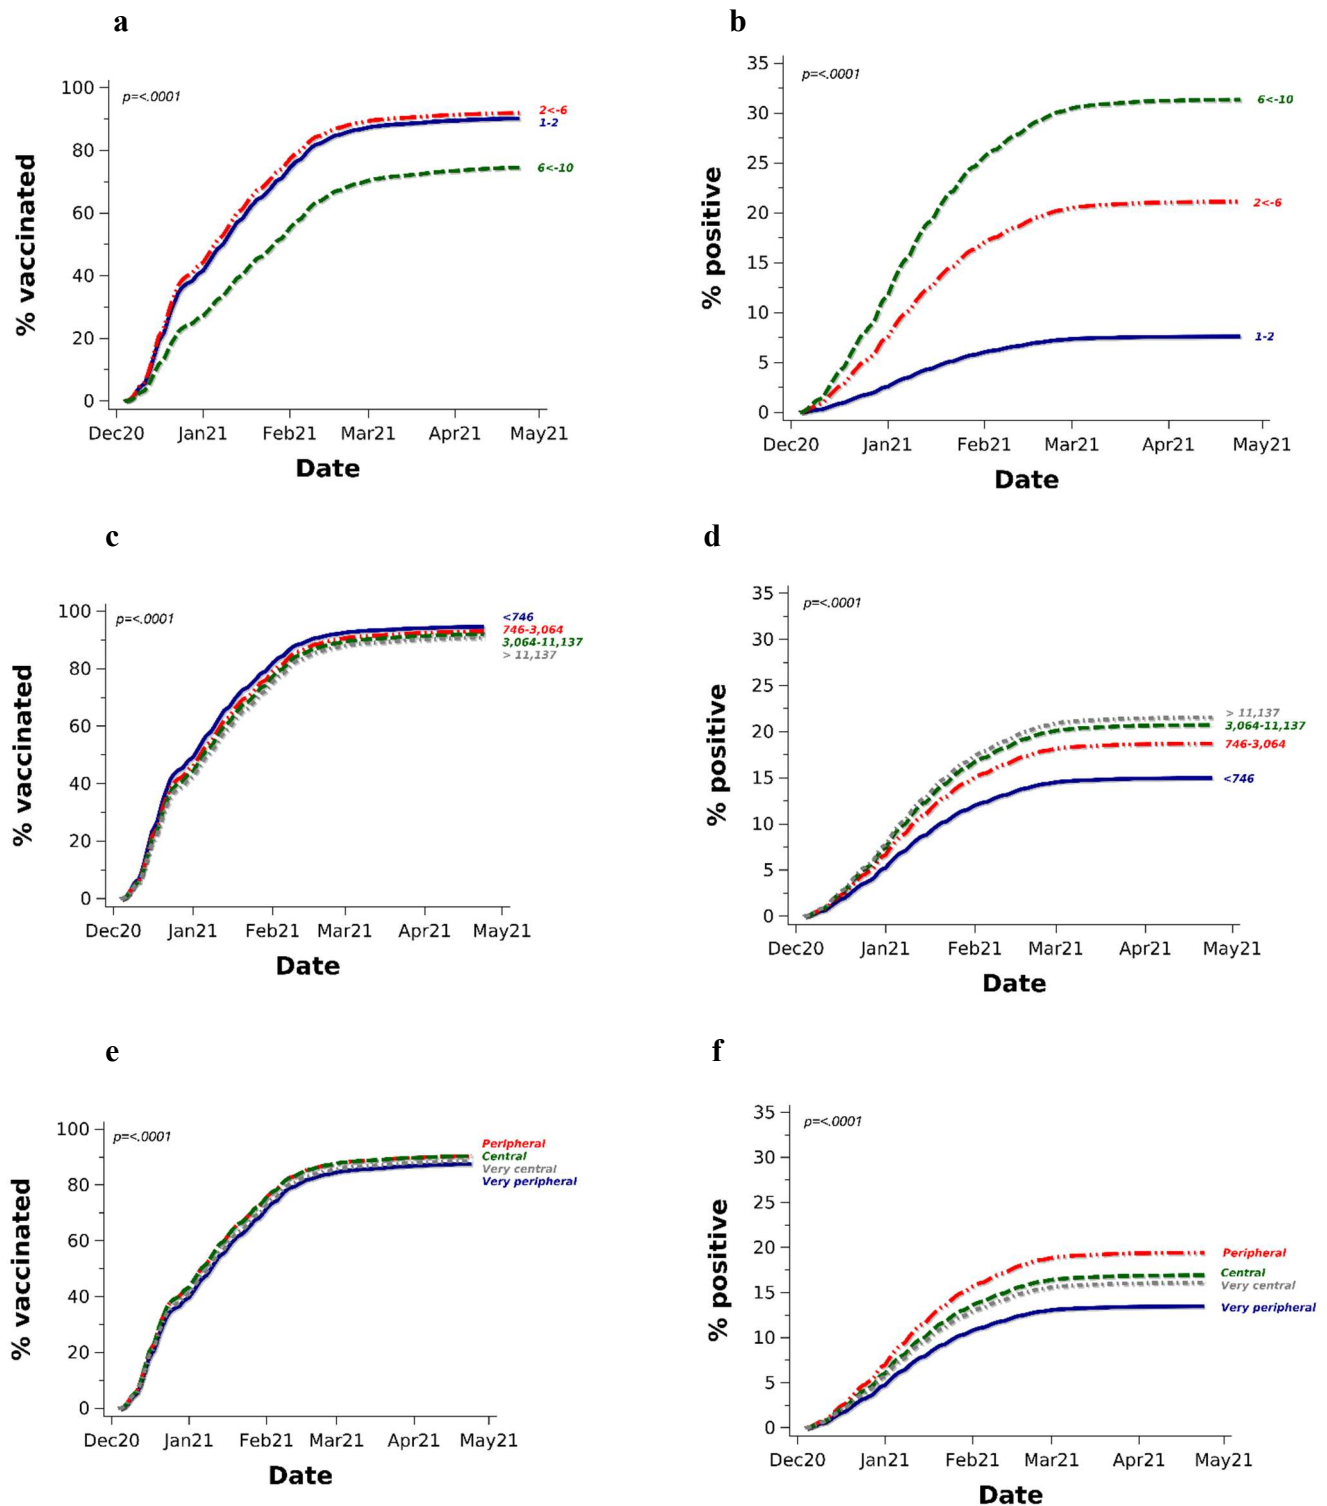

**Figure S2: Age adjusted cumulative vaccination incidence and age adjusted competing SARS-CoV-2 infection rates by: mean number of household members (a,b); area population/km<sup>2</sup> (c,d); and periphery (e,f).**

Percent (%) of vaccinated refer to cumulative incidence /100 accounting for the competing COVID-19 infection risk. % positive refers to cumulative SARS-CoV-2 infection rate/100 based on Kaplan-Meier infection-free survival. Results are presented for the 60-64 age slice for comparability.

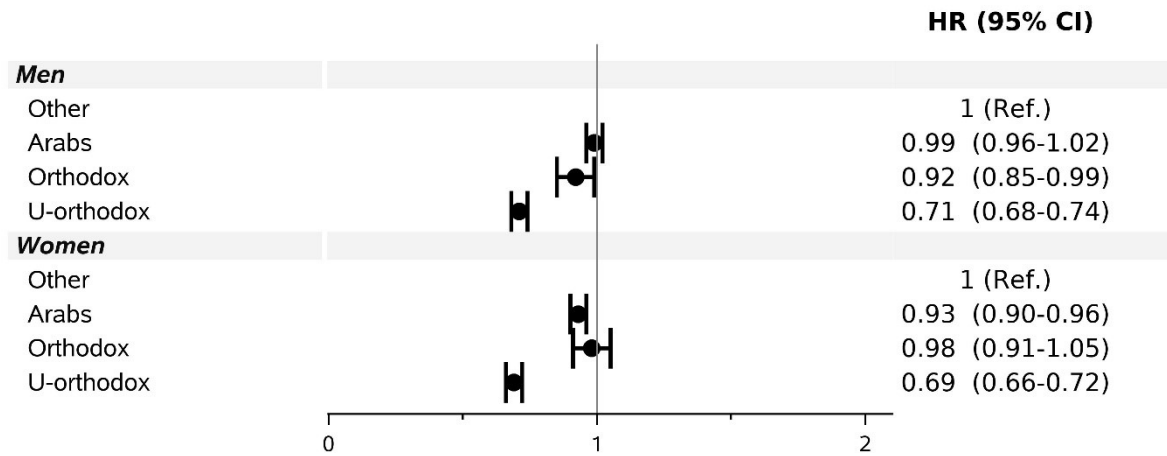

**Figure S3: Multivariable adjusted hazard ratio (HR) and 95% confidence interval (CI) under sex and population group interaction**

Ref. denotes reference.  $P$  for interaction = 0.005

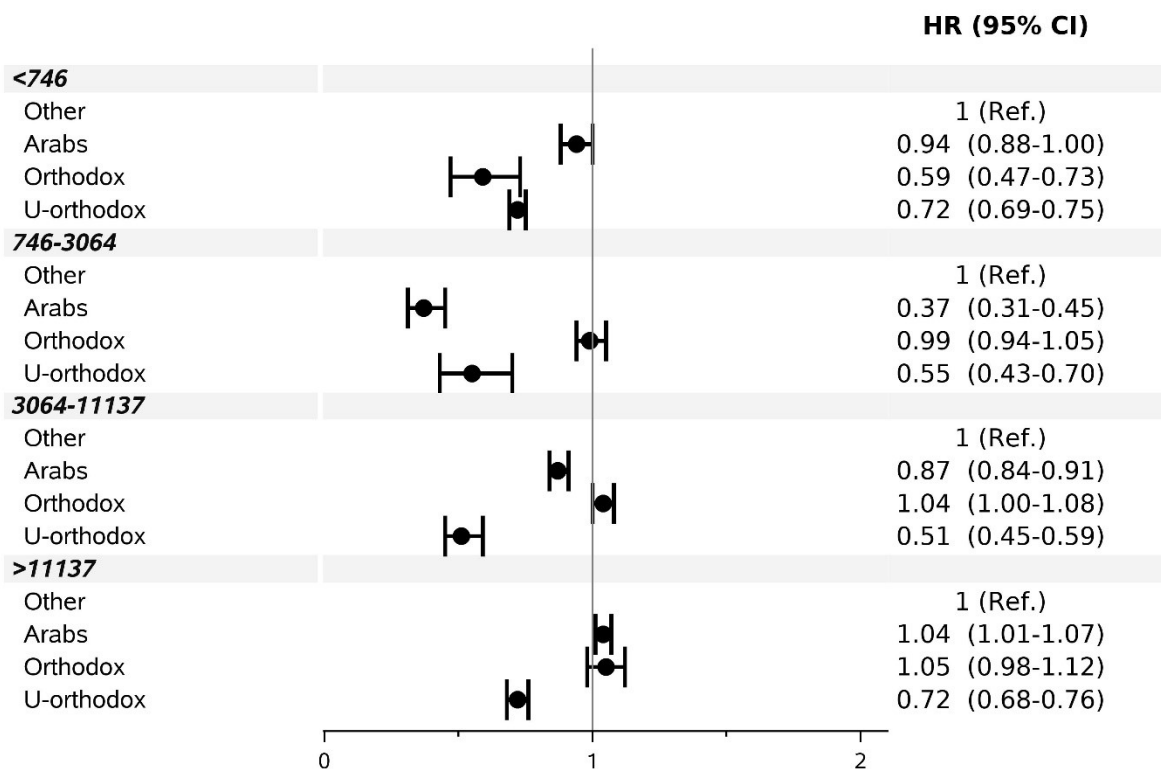

**Figure S4: Multivariable adjusted hazard ratio (HR) and 95% confidence interval (CI) under area population density (population/km<sup>2</sup>) and population group interaction**

Ref. denotes reference.  $P$  for interaction < 0.0001



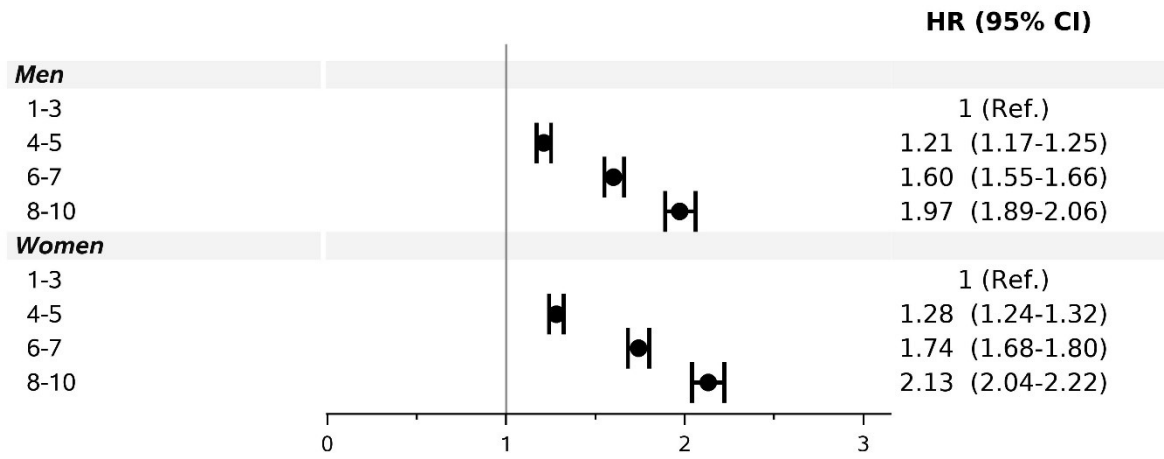

**Figure S5: Multivariable adjusted hazard ratio (HR) and 95% confidence interval (CI) under sex and socioeconomic status group interaction**

Ref. denotes reference.  $P$  for interaction=0.002

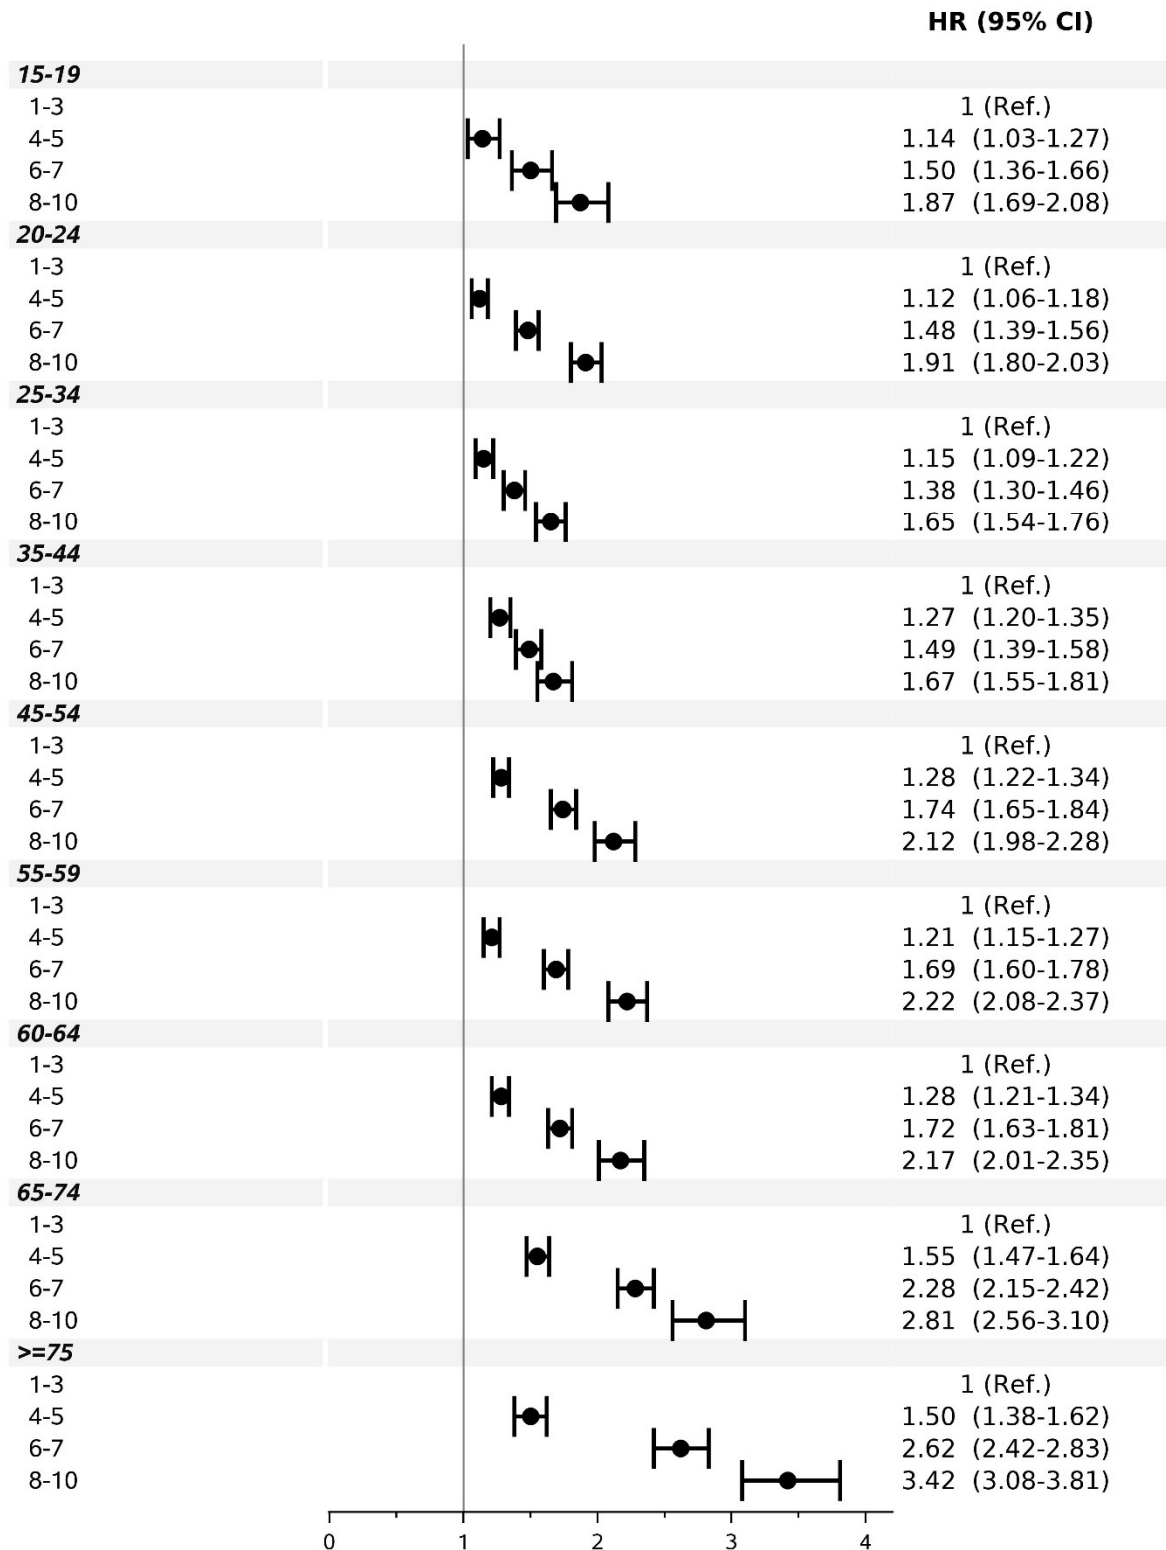

**Figure S6: Multivariable adjusted hazard ratio (HR) and 95% confidence interval (CI) under age and socioeconomic rank interaction**

Ref. denotes reference.  $P$  for interaction  $<0.0001$

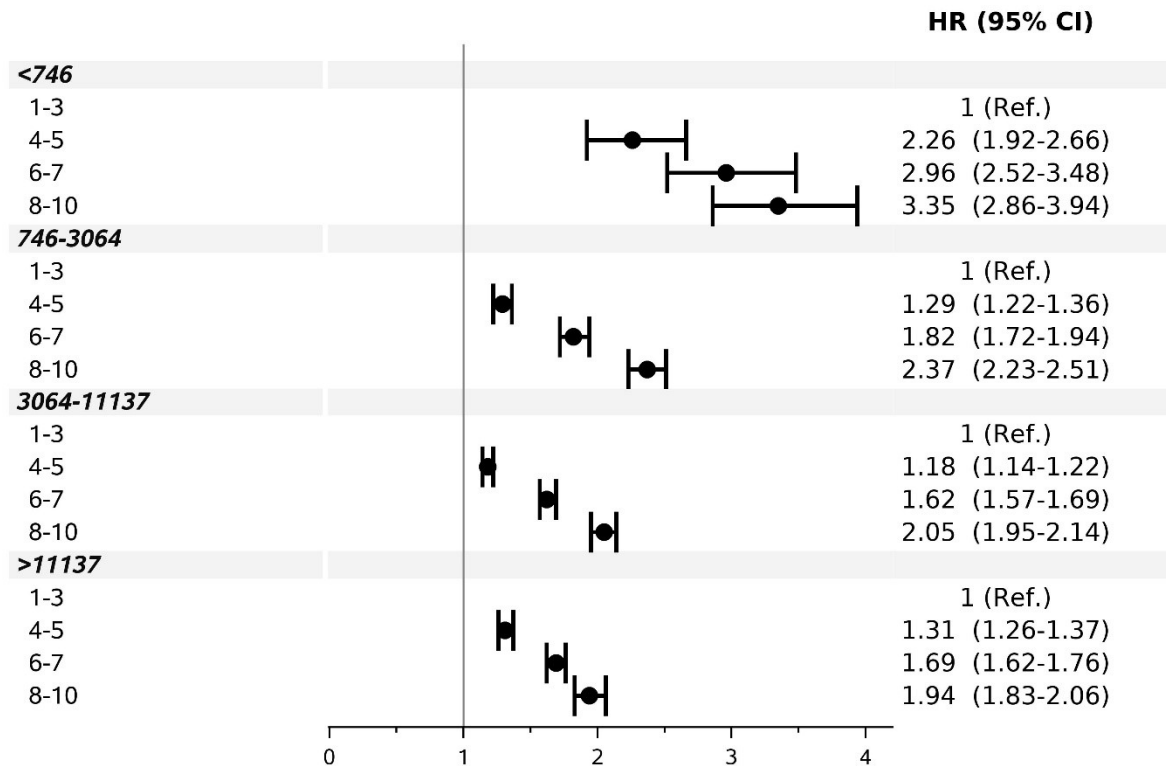

**Figure S7: Multivariable adjusted hazard ratio (HR) and 95% confidence interval (CI) under area population density (population/km<sup>2</sup>) and socioeconomic status group interaction**

Ref. denotes reference.  $P < 0.0001$

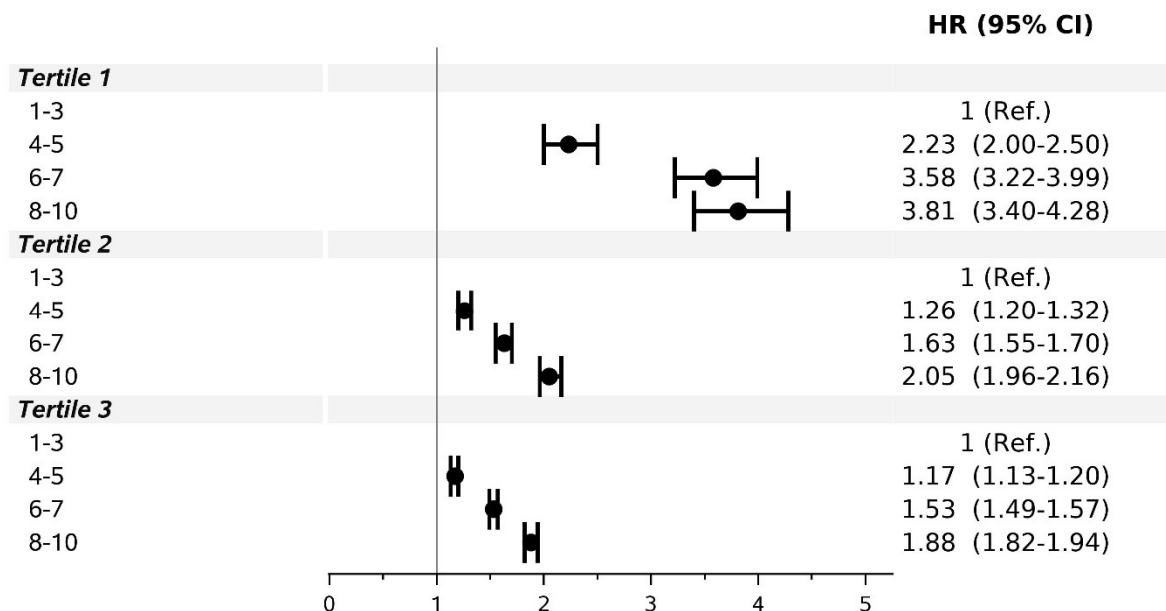

**Figure S8: Multivariable adjusted hazard ratio (HR) and 95% confidence interval (CI) under pre-vaccine infection rate tertile and socioeconomic rank interaction**

Ref. denotes reference.  $P$  for interaction  $< 0.0001$

## **METHOD DETAILS**

### **Classification of population group**

A number of data sources were used for the identification of the predominant population group in each geo-spatial units (referred to as “area” hereafter).

1. The share of each population group in each area categorized by POINTS as: none (<10%), low (10-20%), intermediate (20-15%), high (50-70%) or very high (>70%).
2. The percent of Arab and Jewish population in the area, reported by the Israeli Bureau of Statistics (ICBS)
3. The percent of Arab and Jewish population in localities, reported by ICBS
4. The percent of ultra-orthodox Jews in localities with ultra-orthodox population reported by Regev et al <sup>1</sup>

Based on these sourced, we identified the predominant population in each area. Following classification the median percent of Arabs in area labeled as “Arab” was 98% (interquartile range:79.5-99.6%), 75% of the areas identified as “Ultra-Orthodox Jewish” had very high (>70%) ultra-orthodox population and 81% of the areas identified as “orthodox Jewish” had very high orthodox population rate.

---

<sup>1</sup> Regev E.Gordon G. The ultra-orthodox housing Market, and geographical distribution of the ultra-orthodox population in Israel. The Israel Democracy Institute. 2020 The Israel Democracy Institution policy paper 150. In Hebrew

### **Data augmentation**

To reduce the dimension of the big data and reduce computation time data was rearranged and augmented as follows:

- Data were stratified by area, sex, and age-group
- Within each stratum, we created a record for each time point (date) in which vaccination occurred and summarized the number of individual vaccinated on the day and the number of new COVID-19 cases detected up to that day since last date with vaccinations.

- The summary data was then augmented to create a separate record for each event type (1=vaccination, 2=competing infection) with the number of individuals with the event type as weight. Another record was added for censoring at the end of follow-up (event type=0) with the number of individual still at risk (area population in stratum minus the number of individual who were vaccinated, detected as COVID-19 case or died up to censoring) as weight.

The results of a model based on the resulting weighted data is identical to those obtained from a model based on individual level data.

### Test of the PH assumption

The proportional hazard assumption was tested based on weighted Schoenfeld residuals in cause-specific models. The correlations and tests of the hypothesis of zero correlation with time rank are listed below:

| <b>Characteristic</b> (reference category)                     |                 | <b>Correlation</b> | <b>P</b> |
|----------------------------------------------------------------|-----------------|--------------------|----------|
| <b>Men</b> (Women)                                             |                 | -0.0263            | <.0001   |
| <b>Age</b> (20-24)                                             | 15-19           | -0.0169            | <.0001   |
|                                                                | 25-34           | -0.00464           | <.0001   |
|                                                                | 35-44           | -0.0577            | <.0001   |
|                                                                | 45-54           | -0.1005            | <.0001   |
|                                                                | 55-59           | -0.1276            | <.0001   |
|                                                                | 60-64           | -0.1949            | <.0001   |
|                                                                | 65-74           | -0.2467            | <.0001   |
|                                                                | ≥75             | -0.2235            | <.0001   |
| <b>Population group</b> (other)                                | Arabs           | 0.0576             | <.0001   |
|                                                                | Orthodox        | -0.0117            | <.0001   |
|                                                                | Ultra orthodox  | -0.0346            | <.0001   |
| <b>SES class</b> (1-3)                                         | 4-5             | -0.0253            | <.0001   |
|                                                                | 6-7             | -0.0562            | <.0001   |
|                                                                | 8-10            | -0.0725            | <.0001   |
| <b>Locality population</b> (<2,000)                            | 2000-99 900     | -0.00585           | <.0001   |
|                                                                | 100 000-499 900 | -0.00214           | <.0001   |
|                                                                | ≥500 000        | -0.0131            | <.0001   |
| <b>Population density</b> population/km <sup>2</sup> (<746)    | 746-3064        | -0.00417           | <.0001   |
|                                                                | 3064-11 137     | 0.000094           | 0.8375   |
|                                                                | > 11 137        | 0.00200            | <.0001   |
| <b>Periphery</b> (Central)                                     | Very central    | -0.0191            | <.0001   |
|                                                                | Peripheral      | 0.0100             | <.0001   |
|                                                                | Very peripheral | -0.0316            | <.0001   |
| <b>Past SARS-CoV-2 Infection rates</b> <sup>a</sup> % (<0.011) | 0.011-0.383     | 0.0912             | <.0001   |
|                                                                | > 0.383         | 0.1230             | <.0001   |
